# Supplementary material for: Curcumin inhibits proliferation–migration of NSCLC by steering crosstalk between a Wnt signaling pathway and an adherens junction via EGR-1
Source: Royal Society of Chemistry journal article supplement (doi:10.1039/c4mb00336e), 2015-01-12
Supplement: c4mb00336e1.xlsx [file c4mb00336e1.xlsx]

## Sheet: DEG.10ul
DEGs	P-Value	LogFC
EGR1	1e-08	-1.0474
MIR622	0.0001	-1.0306
DUSP6	0.0001	-1.0209
SNORA14A	0.0001	-1.0272
RNU4ATAC	0.0002	-1.0231
PPIAL4G	0.0002	-1.042
PA2G4	0.0003	-1.0333
FOSL1	0.0003	-1.0186
CTGF	0.0003	-1.0192
RRN3P1	0.0004	-1.0285
TUBA1B	0.0004	-1.0258
RNF5P1	0.0005	-1.02
GCSH	0.0005	-1.0297
NOC2L	0.0005	-1.0268
MIR155	0.0005	-1.0176
DKK1	0.0006	-1.0171
CFL1	0.0006	-1.0357
LY6K	0.0006	-1.0181
EIF5AL1	0.0007	-1.0356
AKT1	0.0007	-1.0277
FOXD4L1	0.0009	-1.0345
MYL12B	0.0009	-1.0284
ANGPT2	0.0009	-1.0143
TMED10	0.0009	-1.0284
ACTB	0.0009	-1.0276
RPLP0	0.001	-1.0284
ZNF416	0.001	-1.0152
PRMT6	0.0011	-1.0133
EXOSC4	0.0012	-1.0148
PNRC2	0.0013	-1.0334
BEND3	0.0013	-1.0182
ETV5	0.0014	-1.018
TFDP1	0.0014	-1.0228
GK3P	0.0015	-1.0264
ARL14	0.0016	-1.0126
SPRY2	0.0017	-1.0133
HNRNPM	0.0017	-1.0134
NCOA5	0.0019	-1.0106
ACTN1	0.002	-1.0247
CES2	0.002	-1.0144
HTR1D	0.002	-1.0147
FAM26E	0.0021	-1.0118
MGST3	0.0021	-1.0294
FLJ90757	0.0021	-1.0148
RIMS2	0.0021	-1.0162
FTH1	0.0022	-1.022
TUBA1C	0.0022	-1.028
H3F3C	0.0025	-1.0268
SHISA5	0.0025	-1.0255
MSX2P1	0.0026	-1.0177
SCNN1B	0.0027	-1.012
SCNN1G	0.0027	-1.0113
FAM50A	0.0027	-1.0207
PEX10	0.0027	-1.0194
CGB	0.0029	-1.0077
SDHAP2	0.0029	-1.0255
PUF60	0.0031	-1.0184
LRRC46	0.0031	-1.0112
POLR3C	0.0031	-1.0125
SAMD9	0.0032	-1.0136
RPS26	0.0032	-1.023
NTSR1	0.0032	-1.0075
MRPL20	0.0032	-1.0197
SYDE1	0.0033	-1.0105
CLDN12	0.0034	-1.0265
RHOC	0.0034	-1.0258
TTC30A	0.0034	-1.0111
UCK1	0.0034	-1.0205
HSPA7	0.0035	-1.0208
PSKH1	0.0035	-1.0133
CD44	0.0035	-1.0237
SUMO1	0.0036	-1.0254
RRP7A	0.0036	-1.013
ST13	0.0037	-1.026
MYEOV	0.0037	-1.0143
CALM3	0.0038	-1.0262
KRTAP10-5	0.0038	-1.014
PPP1R10	0.0038	-1.0132
COX5B	0.0038	-1.0251
C9orf123	0.0038	-1.025
LCMT2	0.0039	-1.0112
SERPINB8	0.0039	-1.0145
ATP5EP2	0.0039	-1.0235
EEF1D	0.004	-1.0212
EIF5	0.004	-1.0127
MMP1	0.0041	-1.0112
LOC728613	0.0043	-1.021
C7orf49	0.0044	-1.0164
KRT18	0.0044	-1.018
EMG1	0.0045	-1.0144
MPDU1	0.0045	-1.0201
TMEM199	0.0045	-1.0186
ANP32A	0.0046	-1.0237
TMEM223	0.0047	-1.0186
RNU12	0.0047	-1.005
NCLN	0.0047	-1.0088
IGFBP3	0.0048	-1.0118
LIF	0.0048	-1.0082
PYROXD1	0.0049	-1.0133
RPS27A	0.0049	-1.0194
CSRP1	0.0049	-1.0207
HINT2	0.005	-1.0199
CRSP8P	0.005	-1.0232
CLN6	0.0051	-1.0133
SHFM1	0.0052	-1.0249
HMBS	0.0052	-1.0157
VTRNA1-3	0.0053	-1.0095
THOC5	0.0053	-1.0127
ATP5G1	0.0053	-1.0242
CDC42EP2	0.0053	-1.0144
SHC3	0.0054	-1.0118
LRRC37A3	0.0054	-1.0249
PHLDA1	0.0055	-1.0169
DHFR	0.0056	-1.0207
NFKBIA	0.0058	-1.0115
FGFRL1	0.0059	-1.0141
ENG	0.0059	-1.0104
PHLDA2	0.0059	-1.0106
ZBTB45	0.006	-1.0094
NT5DC2	0.006	-1.0208
SLC6A17	0.0061	-1.01
CHCHD3	0.0061	-1.0241
FOS	0.0062	-1.0085
NDUFA12	0.0062	-1.0241
SAE1	0.0062	-1.0222
FOXRED1	0.0063	-1.0136
NUDT4P1	0.0063	-1.0233
DGCR8	0.0063	-1.0144
DBNL	0.0063	-1.0129
FUS	0.0064	-1.0106
DOHH	0.0064	-1.0147
MYBBP1A	0.0064	-1.0102
RPL15	0.0066	-1.02
E2F4	0.0066	-1.0091
SPRY4	0.0067	-1.0083
DNAJC11	0.0068	-1.0106
HRK	0.007	-1.0216
PTP4A2	0.007	-1.0208
FAM127C	0.0071	-1.0204
CCR10	0.0071	-1.0134
GPATCH4	0.0072	-1.0137
SNORD116-11	0.0072	-1.0113
AP2A2	0.0073	-1.0144
NDUFB9	0.0075	-1.0212
HLA-J	0.0076	-1.0231
S100A10	0.0076	-1.0231
MRTO4	0.0077	-1.0099
SCAND1	0.0077	-1.0174
TMBIM6	0.0078	-1.023
LOC100128653	0.0078	-1.0084
EEF2K	0.0079	-1.0094
TNFRSF12A	0.0079	-1.0078
PFAS	0.0079	-1.0063
NUDT22	0.008	-1.0162
FAU	0.008	-1.0194
CDC42EP1	0.0081	-1.0158
GNG11	0.0081	-1.0103
PRB1	0.0083	-1.0131
ABHD11	0.0083	-1.0107
DHX37	0.0084	-1.0142
EIF6	0.0084	-1.015
KCNG1	0.0084	-1.0113
PABPC3	0.0085	-1.0233
LOC100130331	0.0085	-1.0235
TRNP1	0.0085	-1.0115
LOC644634	0.0086	-1.0114
PRR22	0.0087	-1.0115
RPL18	0.0087	-1.0232
HEATR3	0.0088	-1.0036
RPL7	0.0089	-1.0232
C11orf58	0.0089	-1.0204
FEN1	0.0089	-1.01
KIFC3	0.0089	-1.0132
GYS1	0.009	-1.0118
RAB5C	0.0091	-1.0216
ETV4	0.0093	-1.0091
CYR61	0.0094	-1.0061
RPL38	0.0094	-1.0219
MT1L	0.0094	-1.023
ARHGAP39	0.0094	-1.0106
POLR2F	0.0094	-1.0201
COMMD4	0.0095	-1.0143
DLX1	0.0095	-1.0071
ANXA2	0.0095	-1.0187
C1QTNF4	0.0095	-1.0132
CCDC99	0.0096	-1.0108
LOC100129534	0.0096	-1.0098
TMBIM1	0.0097	-1.0218
SDCCAG3	0.0098	-1.0091
KRT15	0.0099	-1.0111
SLC25A10	0.0099	-1.0073
HMGCS1	1e-06	0.9766
STARD4	1e-06	0.9781
DYNC1I2	0.0001	0.9681
INSIG1	0.0001	0.9808
RALGAPA1	0.0001	0.9701
PTTG3P	0.0001	0.9827
CYP51A1	0.0001	0.972
KCNH7	0.0001	0.9833
SCD	0.0001	0.974
HMGCR	0.0002	0.9831
TPTE	0.0002	0.9742
TFDP3	0.0002	0.978
SNORD14E	0.0002	0.9835
SNORD59A	0.0002	0.9747
IKZF5	0.0002	0.9835
SNORD117	0.0002	0.9839
SNORD113-3	0.0003	0.9844
ENPP5	0.0003	0.9847
IFNA14	0.0003	0.9731
MALAT1	0.0003	0.9843
SNORD114-2	0.0003	0.985
FAM115A	0.0004	0.9751
GNRH1	0.0004	0.985
PANK3	0.0004	0.9833
ZNF770	0.0005	0.9769
DLEU2L	0.0005	0.9778
ATP1B2	0.0006	0.9842
LCOR	0.0006	0.9851
TTBK2	0.0006	0.9848
DBF4	0.0006	0.9776
MLL	0.0006	0.9843
UQCRB	0.0006	0.9853
CHD9	0.0006	0.9811
KIAA1328	0.0006	0.9846
FKBP14	0.0008	0.9864
SCARNA9L	0.0009	0.9841
SEC24D	0.0009	0.9858
THAP2	0.0009	0.9818
ATF7IP2	0.0009	0.9848
FN1	0.0009	0.9819
ATG4A	0.0009	0.982
PCDH9	0.0009	0.9846
WDR17	0.0009	0.9857
HCFC2	0.001	0.9855
PURG	0.001	0.9853
ALDH1L2	0.001	0.9874
ZMYM6	0.001	0.9841
ZNF280C	0.0011	0.9872
MAGT1	0.0011	0.9798
GPR155	0.0012	0.989
C10orf118	0.0012	0.9866
PRPF39	0.0012	0.9857
TAS2R46	0.0012	0.9848
DENND2C	0.0012	0.9842
OR1S2	0.0012	0.9812
TMEM81	0.0012	0.9879
CDH1	0.0012	0.9865
ZBTB11	0.0013	0.9843
SNORA16B	0.0013	0.9877
FGD6	0.0014	0.9866
SNORD58A	0.0015	0.9876
SERPINI1	0.0015	0.9866
SNORA8	0.0015	0.9863
HPS3	0.0015	0.9871
KLF12	0.0015	0.9854
HSD17B7	0.0015	0.992
SNORA50	0.0016	0.9854
NKTR	0.0016	0.9875
PER1	0.0016	0.9848
TAS2R31	0.0016	0.9881
PPM1K	0.0017	0.9868
UGT8	0.0017	0.9864
LIN7C	0.0017	0.9856
ERO1LB	0.0017	0.9867
ARL5B	0.0017	0.9843
CXCR4	0.0018	0.9848
REL	0.0018	0.988
FREM2	0.0018	0.9872
POU2F1	0.0018	0.987
ZKSCAN1	0.0019	0.9861
SNRNP48	0.0019	0.9869
KLRAP1	0.002	0.9862
LOC100130507	0.002	0.9801
BDP1	0.0021	0.9819
RPL23AP53	0.0021	0.9814
CLCN6	0.0021	0.987
MIR16-2	0.0022	0.9847
PIKFYVE	0.0022	0.9872
GOLGA4	0.0023	0.9863
KIAA1377	0.0023	0.9878
PAR5	0.0024	0.9871
TMEM39A	0.0024	0.9873
ST6GALNAC3	0.0024	0.9798
CBWD5	0.0025	0.9823
LOC100129858	0.0025	0.9837
MAN1A1	0.0025	0.9858
CDKL5	0.0025	0.9891
PFKFB2	0.0025	0.9845
ZNF184	0.0026	0.9871
ZSCAN23	0.0026	0.9872
DBP	0.0026	0.9869
CEP57L1	0.0026	0.9864
SPTY2D1	0.0026	0.9873
EPB41	0.0027	0.9863
RPL23AP32	0.0028	0.9896
FBXO48	0.0029	0.9859
ACBD3	0.0029	0.9873
ZNF14	0.0029	0.989
GSK3B	0.003	0.9865
SNORD116-2	0.003	0.9773
CLK4	0.0031	0.9866
IER3IP1	0.0032	0.9808
COX4I1	0.0033	0.9794
IK	0.0033	0.9865
SCML2	0.0033	0.9876
ZMAT3	0.0033	0.9892
SBNO1	0.0033	0.9879
LGALS9C	0.0033	0.9875
C1orf63	0.0034	0.9851
JHDM1D	0.0034	0.9879
SEC24B	0.0034	0.9877
SQLE	0.0034	0.9886
NETO1	0.0035	0.9859
NIPSNAP3B	0.0035	0.9877
LOC646214	0.0035	0.9875
KRTAP13-1	0.0036	0.9849
LRIG2	0.0036	0.9877
FAM8A1	0.0036	0.9873
NAP1L3	0.0036	0.9869
CEP170P1	0.0036	0.9843
RNPC3	0.0037	0.9889
DIS3	0.0037	0.9863
PLEKHH2	0.0037	0.9884
FAM102B	0.0038	0.9875
GDPD1	0.0039	0.9855
GPAM	0.0039	0.9874
PLAG1	0.0039	0.9884
SLCO4C1	0.0039	0.9866
HSD17B7P2	0.0039	0.9879
CRISPLD2	0.004	0.9867
C3orf35	0.004	0.9872
HIVEP2	0.004	0.9885
NPM1	0.004	0.98
LOC100287934	0.004	0.9879
KLHL24	0.0041	0.99
ZNF277	0.0041	0.986
GUSBP3	0.0041	0.9877
MBLAC2	0.0041	0.9881
SEC24A	0.0041	0.9882
SCARNA7	0.0042	0.9879
CLK3	0.0042	0.9824
OCLM	0.0042	0.9937
ZNF841	0.0042	0.9866
AKAP9	0.0043	0.9891
ELF1	0.0043	0.9866
TTC14	0.0044	0.9879
DUSP19	0.0044	0.9873
XPR1	0.0045	0.9877
LBR	0.0045	0.9856
CDC42	0.0046	0.9826
MLL3	0.0047	0.9891
TTC32	0.0047	0.987
ZNF449	0.0048	0.99
LRRC7	0.0048	0.9888
H3F3A	0.0048	0.9841
NR1D1	0.0049	0.9879
ENTPD7	0.0049	0.9879
DCTN6	0.0049	0.9864
HOXA1	0.005	0.9868
SNX3	0.005	0.9813
TMF1	0.005	0.9886
SNORD59B	0.005	0.9891
HCFC1R1	0.0051	0.9862
DNAJA2	0.0051	0.9817
PAG1	0.0051	0.9887
UBE2K	0.0052	0.9832
DBT	0.0052	0.991
ANKRD20A1	0.0053	0.9882
KBTBD3	0.0053	0.9875
ARCN1	0.0053	0.9874
RINT1	0.0054	0.9859
SPRY3	0.0054	0.9878
GOLGA6L10	0.0055	0.9874
ERLEC1	0.0055	0.9877
IDI1	0.0056	0.9922
CEP97	0.0057	0.9884
MGEA5	0.0057	0.9886
DCDC1	0.0057	0.9867
DTNA	0.0058	0.9893
ANKRD50	0.0058	0.9884
HERC2P4	0.0059	0.9895
ZNF192	0.0059	0.9935
MED13	0.006	0.9892
NFYB	0.006	0.9847
COX6B2	0.006	0.9882
ACSL4	0.0061	0.9886
CLIC1	0.0061	0.982
DSG2	0.0061	0.9887
HSDL1	0.0061	0.9884
EXOC8	0.0061	0.9882
LRP6	0.0062	0.989
CALU	0.0062	0.9885
MYO6	0.0062	0.988
GSTA5	0.0062	0.9865
CDKL2	0.0062	0.9889
RPSAP52	0.0063	0.9856
CHORDC1	0.0063	0.9955
OR8H3	0.0064	0.9847
XCL2	0.0064	0.9829
ABI1	0.0065	0.9872
ALDH6A1	0.0065	0.9895
RBM7	0.0065	0.9876
PLA2G4A	0.0066	0.9882
DNAJC6	0.0066	0.9885
CDKN1B	0.0066	0.9883
USP12	0.0067	0.9846
ZNF493	0.0067	0.993
SMG1	0.0067	0.9891
ZNF443	0.0067	0.9864
NUCKS1	0.0067	0.9866
PRRC1	0.0067	0.989
ZYG11B	0.0068	0.9904
NIPBL	0.0068	0.9884
EIF5A2	0.0068	0.988
GLCE	0.0068	0.9909
UGT2B28	0.0069	0.9881
MTMR11	0.007	0.9883
NHLRC2	0.007	0.9893
CD46	0.007	0.9883
LRRC8B	0.007	0.9908
MIB1	0.0071	0.9885
RFX3	0.0072	0.9881
KIF4B	0.0072	0.9869
HINT3	0.0072	0.9906
RPL19	0.0072	0.9853
TUBD1	0.0072	0.9904
CCNA1	0.0072	0.9889
ANKRD32	0.0073	0.9864
TC2N	0.0073	0.9883
ANKRD34B	0.0073	0.9902
KRTAP9-2	0.0074	0.9846
PPAP2A	0.0075	0.9875
DOK6	0.0076	0.9883
COG6	0.0076	0.9901
HOOK1	0.0076	0.9904
UBR2	0.0076	0.9887
ARG2	0.0077	0.9889
OSBP	0.0077	0.9883
RAVER2	0.0077	0.9883
ZCCHC2	0.0079	0.9873
FBXO36	0.0079	0.9876
TP53TG3	0.0079	0.9884
FAM160B1	0.008	0.9897
PPIG	0.0081	0.9888
CBR4	0.0081	0.9898
ZFP14	0.0082	0.9895
MAP3K13	0.0082	0.9891
TOM1L1	0.0082	0.9879
DPYD	0.0082	0.9889
PDZD11	0.0083	0.9837
UBR5	0.0083	0.99
LUC7L3	0.0083	0.9891
MED1	0.0084	0.989
EYA3	0.0084	0.9888
BRWD3	0.0085	0.9896
SCAI	0.0085	0.9907
MIR127	0.0087	0.9877
DGKE	0.0087	0.9886
CENPC1	0.0087	0.9892
FNIP1	0.0087	0.9892
SCARNA8	0.0087	0.9912
MPRIP	0.0088	0.9841
ARSG	0.0089	0.989
ZNF208	0.009	0.9875
ZNF767	0.009	0.9897
SLC2A12	0.009	0.989
PGAP1	0.009	0.9903
AASS	0.009	0.9904
PLCB4	0.0091	0.9897
SKP1	0.0091	0.9853
FAM63B	0.0092	0.9915
HEATR5A	0.0093	0.9906
SNRPA1	0.0093	0.9875
HLA-C	0.0093	0.9855
ZNF281	0.0093	0.9894
TTC21B	0.0093	0.9894
HIAT1	0.0094	0.9898
NF1	0.0095	0.9892
VKORC1L1	0.0095	0.9859
FRZB	0.0095	0.9881
GPC2	0.0095	0.9877
XRN1	0.0096	0.9898
SLC30A1	0.0096	0.9882
PEG10	0.0096	0.9926
CDH10	0.0098	0.9896

## Sheet: DEG.20ul
DEGs	P-value	logFC
MIR155	2e-06	-1.0011
CGB	3e-05	-1.0013
MMP1	0.0001	-1.001
MIR154	0.0002	-1.0012
ANGPT2	0.0002	-1.0011
CTGF	0.0002	-1.0012
LOC100506571	0.0002	-1.0007
KRTAP10-5	0.0002	-1.001
RNU4ATAC	0.0002	-1.0012
PFKFB4	0.0003	-1.0007
ATG4B	0.0004	-1.0006
SPCS2	0.0005	-1.0008
CYP4Z1	0.0005	-1.0006
EGR1	0.0005	-1.0023
TMPRSS11E	0.0006	-1.0006
DDIT4	0.0006	-1.0006
C20orf203	0.0009	-1.0006
IGHD	0.0011	-1.0004
MGC23284	0.0011	-1.0006
IGLJ3	0.0014	-1.0003
LOC100128292	0.0014	-1.0006
NDOR1	0.0015	-1.0007
LOC100128653	0.0015	-1.0008
RNU12	0.0015	-1.001
CLRN2	0.0017	-1.0005
SCNN1G	0.0017	-1.0009
ZNF487P	0.0018	-1.0004
VN1R4	0.0018	-1.0004
TPTE2	0.0019	-1.0003
MCM7	0.0019	-1.0007
HIRA	0.0021	-1.0007
OR7E5P	0.0021	-1.0004
CFC1B	0.0021	-1.0005
USP12	0.0022	-1.0004
C10orf10	0.0023	-1.0006
RGPD4	0.0023	-1.0003
C2orf66	0.0024	-1.0004
EEF2K	0.0026	-1.0007
PDK1	0.0026	-1.0005
KRTAP13-1	0.0027	-1.0003
NCOA5	0.0027	-1.001
ARVP6125	0.0027	-1.0004
OR4N4	0.0027	-1.0004
RSPH10B	0.0027	-1.0004
NTSR1	0.0027	-1.001
DOC2B	0.0027	-1.0006
SNORD116-28	0.0027	-1.0005
ARL14	0.0029	-1.001
SLC16A3	0.0029	-1.0007
NDRG1	0.0035	-1.0005
MIR95	0.0038	-1.0004
FAM86DP	0.004	-1.0007
MIR106B	0.004	-1.0006
RIBC2	0.0042	-1.0008
TAS2R13	0.0042	-1.0004
OR2T11	0.0042	-1.0005
ANGPTL4	0.0043	-1.0005
IFI30	0.0043	-1.0004
FOSL1	0.0044	-1.0009
SLC2A1	0.0044	-1.0005
HK2	0.0046	-1.0005
CES2	0.0047	-1.0007
FAM48B2	0.0049	-1.0003
C16orf55	0.0049	-1.0005
RNU11	0.005	-1.0006
CABLES1	0.005	-1.0006
OCM	0.0051	-1.0003
MIR375	0.0052	-1.0005
TXNIP	0.0052	-1.0003
DUSP6	0.0052	-1.0007
SPDYE5	0.0054	-1.0003
MIR485	0.0054	-1.0005
XCL1	0.0055	-1.0003
GLIPR1	0.0055	-1.0006
SNORD115-44	0.0056	-1.0004
DKK1	0.0056	-1.0008
APOA1	0.0057	-1.0004
HLA-DMA	0.0058	-1.0004
SLC25A21	0.0059	-1.0003
ZDHHC14	0.0059	-1.0005
PRMT6	0.0059	-1.0007
KCNS1	0.0059	-1.0003
SNORA16B	0.006	-0.9994
MIR301A	0.0061	-1.0005
PFAS	0.0062	-1.0007
PMS2CL	0.0062	-1.0006
IFNA5	0.0063	-1.0003
MOCS3	0.0063	-1.0008
DSERG1	0.0064	-1.0003
TNS3	0.0064	-1.0005
RAB42	0.0065	-1.0004
TEX15	0.0065	-1.0005
LCMT2	0.0067	-1.0008
VAV2	0.0067	-1.0006
ZNF578	0.0069	-1.0003
NCLN	0.007	-1.0008
RIMBP3C	0.0071	-1.0007
KRTAP4-7	0.0071	-1.0003
HEATR3	0.0073	-1.0007
OR1S1	0.0073	-1.0003
PRMT3	0.0074	-1.0005
SMG6	0.0074	-1.0004
TTC30A	0.0077	-1.0007
PPP2R3C	0.0077	-1.0004
CHAF1B	0.008	-1.0005
TRIM26	0.0081	-1.0005
LGALS13	0.0084	-1.0005
GYS1	0.0084	-1.0006
FAM26E	0.0084	-1.0007
NFKBIA	0.0085	-1.0006
ANKS6	0.0086	-1.0006
TOMM40	0.0086	-1.0005
CYP4A11	0.0087	-1.0002
TBC1D3G	0.0087	-1.0004
KRTAP5-5	0.0088	-1.0003
ROPN1L	0.0088	-1.0005
SNORD115-10	0.0089	-1.0003
ZBTB1	0.0091	-1.0004
MIR622	0.0092	-1.0005
PSKH1	0.0092	-1.0006
ZNF266	0.0092	-1.0005
NAB2	0.0092	-1.0005
TRNP1	0.0092	-1.0007
ABHD11	0.0093	-1.0006
EXOSC4	0.0093	-1.0005
TAS2R43	0.0095	-1.0002
TTC25	0.0095	-1.0004
PHLDA2	0.0095	-1.0007
CBS	0.0096	-1.0005
C8orf58	0.0096	-1.0006
MIR32	0.0096	-1.0002
PAH	0.0097	-1.0003
SDCCAG3	0.0097	-1.0007
SERPINF1	0.0099	-1.0002
HMGCS1	0.0001	0.9987
GOLGA8E	0.0001	0.9992
GOLGA6L1	0.0001	0.9993
GH1	0.0002	0.9992
GOLGA8C	0.0002	0.9994
STARD4	0.0003	0.9989
LOC646513	0.0003	0.9992
SERPINI1	0.0006	0.9992
SCARNA9L	0.0007	0.9992
SNORD14E	0.0008	0.999
MRGPRD	0.0008	0.9995
MIR105-1	0.0009	0.9995
ZNF280C	0.0009	0.9991
DYNC1I2	0.001	0.9994
CBWD5	0.0012	0.9995
ZFP92	0.0013	0.9996
ADH1C	0.0013	0.9996
CHORDC1	0.0015	0.9991
OR2T6	0.0017	0.9996
PAGE2	0.0017	0.9998
LGALS9B	0.0018	0.9995
ENPP5	0.0018	0.9991
UQCRB	0.0019	0.9993
CGB1	0.002	0.9996
CXCR4	0.0021	0.9994
SCARNA7	0.0022	0.9993
KIF4B	0.0024	0.9995
GRAP	0.0025	0.9996
CES1	0.0025	0.9996
TMEM81	0.0025	0.9992
TAF13	0.0026	0.9994
FAM75C1	0.0026	0.9996
C3orf79	0.0026	0.9997
MIR130B	0.0027	0.9994
GPAM	0.0027	0.9994
CST2	0.0029	0.9996
SPRN	0.003	0.9995
CA5A	0.003	0.9997
OR51A4	0.0031	0.9995
KBTBD8	0.0032	0.9995
SFTA2	0.0032	0.9996
HSD17B7	0.0034	0.9992
FAM72D	0.0035	0.9993
NANOGP1	0.0037	0.9998
TEX13A	0.0038	0.9997
ZNF443	0.0039	0.9997
VSIG1	0.004	0.9997
SNORD114-2	0.004	0.9993
CSH2	0.0041	0.9997
OR8A1	0.0041	0.9997
KCNH7	0.0041	0.9992
STARD6	0.0042	0.9997
PTTG3P	0.0042	0.9992
PRAMEF4	0.0046	0.9996
SLC5A7	0.0047	0.9996
MAP1LC3C	0.0047	0.9996
FKBP14	0.0052	0.9993
ANXA13	0.0052	0.9997
C15orf60	0.0053	0.9997
FCGR1A	0.0055	0.9997
PTTG1	0.0056	0.9994
TAS2R31	0.0057	0.9993
SNORD117	0.0057	0.9995
TFDP3	0.0058	0.9994
SRL	0.0059	0.9996
RNASE3	0.0059	0.9998
CXorf48	0.006	0.9997
ALDH1L2	0.0061	0.9993
DSG2	0.0062	0.9994
NR1D2	0.0063	0.9993
ADAD2	0.0063	0.9995
GPR119	0.0063	0.9997
ZMAT3	0.0064	0.9993
MALAT1	0.0065	0.9993
SPTY2D1	0.0065	0.9994
SEMA6A	0.0065	0.9995
PLGLA	0.0067	0.9999
STK19	0.0067	0.9997
INHBC	0.0068	0.9997
FAM115A	0.0068	0.9995
FAM133B	0.0068	0.9993
GPR155	0.0069	0.9994
ORM1	0.007	0.9998
SHBG	0.007	0.9997
PLAG1	0.007	0.9993
SNORD59B	0.0071	0.9993
C4BPB	0.0072	0.9997
SNORD58A	0.0072	0.9994
HMGB3P1	0.0072	0.9996
ZNF192	0.0073	0.9993
CCL4	0.0074	0.9998
WASH7P	0.0074	0.9998
POM121L12	0.0074	0.9997
MIR516B2	0.0074	0.9997
IDI1	0.0075	0.9994
REL	0.0075	0.9994
CDKL5	0.0076	0.9994
XCL2	0.0076	0.9996
UGT2B17	0.0077	0.9998
C19orf77	0.0077	0.9996
TLR5	0.0078	0.9994
GIPC3	0.0078	0.9997
GPCPD1	0.0078	0.9996
GAD2	0.008	0.9997
TRIB2	0.0082	0.9997
BUB1	0.0082	0.9994
MX2	0.0082	0.9997
HIVEP2	0.0083	0.9994
IGLON5	0.0083	0.9998
MIR128-2	0.0083	0.9997
C2	0.0084	0.9997
TMEM211	0.0084	0.9998
AKAP9	0.0085	0.9994
LCE1B	0.0087	0.9998
NKTR	0.0088	0.9994
CYP2D6	0.0089	0.9995
POU2F1	0.009	0.9994
OBP2A	0.0091	0.9995
COL9A1	0.0092	0.9996
OR4D2	0.0093	0.9997
MIR197	0.0093	0.9995
ATF7IP	0.0094	0.9994
HMGCR	0.0094	0.9994
SPAG7	0.0096	0.9997
H3F3A	0.0097	0.9997
IKZF5	0.0097	0.9994
CLK4	0.0097	0.9995
GPR63	0.0099	0.9994
SCML2	0.0099	0.9994
CHGB	0.0099	0.9996

## Sheet: overlap
Total	overlap DEGs	Unique DEGs for 10 ul	Uniqure DEGs for 20 ul
AASS	ABHD11	AASS	ADAD2
ABHD11	AKAP9	ABI1	ADH1C
ABI1	ALDH1L2	ACBD3	ANGPTL4
ACBD3	ANGPT2	ACSL4	ANKS6
ACSL4	ARL14	ACTB	ANXA13
ACTB	CBWD5	ACTN1	APOA1
ACTN1	CDKL5	AKT1	ARVP6125
ADAD2	CES2	ALDH6A1	ATF7IP
ADH1C	CGB	ANKRD20A1	ATG4B
AKAP9	CHORDC1	ANKRD32	BUB1
AKT1	CLK4	ANKRD34B	C10orf10
ALDH1L2	CTGF	ANKRD50	C15orf60
ALDH6A1	CXCR4	ANP32A	C16orf55
ANGPT2	DKK1	ANXA2	C19orf77
ANGPTL4	DSG2	AP2A2	C2
ANKRD20A1	DUSP6	ARCN1	C20orf203
ANKRD32	DYNC1I2	ARG2	C2orf66
ANKRD34B	EEF2K	ARHGAP39	C3orf79
ANKRD50	EGR1	ARL5B	C4BPB
ANKS6	ENPP5	ARSG	C8orf58
ANP32A	EXOSC4	ATF7IP2	CA5A
ANXA13	FAM115A	ATG4A	CABLES1
ANXA2	FAM26E	ATP1B2	CBS
AP2A2	FKBP14	ATP5EP2	CCL4
APOA1	FOSL1	ATP5G1	CES1
ARCN1	GPAM	BDP1	CFC1B
ARG2	GPR155	BEND3	CGB1
ARHGAP39	GYS1	BRWD3	CHAF1B
ARL14	H3F3A	C10orf118	CHGB
ARL5B	HEATR3	C11orf58	CLRN2
ARSG	HIVEP2	C1QTNF4	COL9A1
ARVP6125	HMGCR	C1orf63	CSH2
ATF7IP	HMGCS1	C3orf35	CST2
ATF7IP2	HSD17B7	C7orf49	CXorf48
ATG4A	IDI1	C9orf123	CYP2D6
ATG4B	IKZF5	CALM3	CYP4A11
ATP1B2	KCNH7	CALU	CYP4Z1
ATP5EP2	KIF4B	CBR4	DDIT4
ATP5G1	KRTAP10-5	CCDC99	DOC2B
BDP1	KRTAP13-1	CCNA1	DSERG1
BEND3	LCMT2	CCR10	FAM133B
BRWD3	LOC100128653	CD44	FAM48B2
BUB1	MALAT1	CD46	FAM72D
C10orf10	MIR155	CDC42	FAM75C1
C10orf118	MIR622	CDC42EP1	FAM86DP
C11orf58	MMP1	CDC42EP2	FCGR1A
C15orf60	NCLN	CDH1	GAD2
C16orf55	NCOA5	CDH10	GH1
C19orf77	NFKBIA	CDKL2	GIPC3
C1QTNF4	NKTR	CDKN1B	GLIPR1
C1orf63	NTSR1	CENPC1	GOLGA6L1
C2	PFAS	CEP170P1	GOLGA8C
C20orf203	PHLDA2	CEP57L1	GOLGA8E
C2orf66	PLAG1	CEP97	GPCPD1
C3orf35	POU2F1	CFL1	GPR119
C3orf79	PRMT6	CHCHD3	GPR63
C4BPB	PSKH1	CHD9	GRAP
C7orf49	PTTG3P	CLCN6	HIRA
C8orf58	REL	CLDN12	HK2
C9orf123	RNU12	CLIC1	HLA-DMA
CA5A	RNU4ATAC	CLK3	HMGB3P1
CABLES1	SCARNA7	CLN6	IFI30
CALM3	SCARNA9L	COG6	IFNA5
CALU	SCML2	COMMD4	IGHD
CBR4	SCNN1G	COX4I1	IGLJ3
CBS	SDCCAG3	COX5B	IGLON5
CBWD5	SERPINI1	COX6B2	INHBC
CCDC99	SNORA16B	CRISPLD2	KBTBD8
CCL4	SNORD114-2	CRSP8P	KCNS1
CCNA1	SNORD117	CSRP1	KRTAP4-7
CCR10	SNORD14E	CYP51A1	KRTAP5-5
CD44	SNORD58A	CYR61	LCE1B
CD46	SNORD59B	DBF4	LGALS13
CDC42	SPTY2D1	DBNL	LGALS9B
CDC42EP1	STARD4	DBP	LOC100128292
CDC42EP2	TAS2R31	DBT	LOC100506571
CDH1	TFDP3	DCDC1	LOC646513
CDH10	TMEM81	DCTN6	MAP1LC3C
CDKL2	TRNP1	DENND2C	MCM7
CDKL5	TTC30A	DGCR8	MGC23284
CDKN1B	UQCRB	DGKE	MIR105-1
CENPC1	USP12	DHFR	MIR106B
CEP170P1	XCL2	DHX37	MIR128-2
CEP57L1	ZMAT3	DIS3	MIR130B
CEP97	ZNF192	DLEU2L	MIR154
CES1	ZNF280C	DLX1	MIR197
CES2	ZNF443	DNAJA2	MIR301A
CFC1B		DNAJC11	MIR32
CFL1		DNAJC6	MIR375
CGB		DOHH	MIR485
CGB1		DOK6	MIR516B2
CHAF1B		DPYD	MIR95
CHCHD3		DTNA	MOCS3
CHD9		DUSP19	MRGPRD
CHGB		E2F4	MX2
CHORDC1		EEF1D	NAB2
CLCN6		EIF5	NANOGP1
CLDN12		EIF5A2	NDOR1
CLIC1		EIF5AL1	NDRG1
CLK3		EIF6	NR1D2
CLK4		ELF1	OBP2A
CLN6		EMG1	OCM
CLRN2		ENG	OR1S1
COG6		ENTPD7	OR2T11
COL9A1		EPB41	OR2T6
COMMD4		ERLEC1	OR4D2
COX4I1		ERO1LB	OR4N4
COX5B		ETV4	OR51A4
COX6B2		ETV5	OR7E5P
CRISPLD2		EXOC8	OR8A1
CRSP8P		EYA3	ORM1
CSH2		FAM102B	PAGE2
CSRP1		FAM127C	PAH
CST2		FAM160B1	PDK1
CTGF		FAM50A	PFKFB4
CXCR4		FAM63B	PLGLA
CXorf48		FAM8A1	PMS2CL
CYP2D6		FAU	POM121L12
CYP4A11		FBXO36	PPP2R3C
CYP4Z1		FBXO48	PRAMEF4
CYP51A1		FEN1	PRMT3
CYR61		FGD6	PTTG1
DBF4		FGFRL1	RAB42
DBNL		FLJ90757	RGPD4
DBP		FN1	RIBC2
DBT		FNIP1	RIMBP3C
DCDC1		FOS	RNASE3
DCTN6		FOXD4L1	RNU11
DDIT4		FOXRED1	ROPN1L
DENND2C		FREM2	RSPH10B
DGCR8		FRZB	SEMA6A
DGKE		FTH1	SERPINF1
DHFR		FUS	SFTA2
DHX37		GCSH	SHBG
DIS3		GDPD1	SLC16A3
DKK1		GK3P	SLC25A21
DLEU2L		GLCE	SLC2A1
DLX1		GNG11	SLC5A7
DNAJA2		GNRH1	SMG6
DNAJC11		GOLGA4	SNORD115-10
DNAJC6		GOLGA6L10	SNORD115-44
DOC2B		GPATCH4	SNORD116-28
DOHH		GPC2	SPAG7
DOK6		GSK3B	SPCS2
DPYD		GSTA5	SPDYE5
DSERG1		GUSBP3	SPRN
DSG2		H3F3C	SRL
DTNA		HCFC1R1	STARD6
DUSP19		HCFC2	STK19
DUSP6		HEATR5A	TAF13
DYNC1I2		HERC2P4	TAS2R13
E2F4		HIAT1	TAS2R43
EEF1D		HINT2	TBC1D3G
EEF2K		HINT3	TEX13A
EGR1		HLA-C	TEX15
EIF5		HLA-J	TLR5
EIF5A2		HMBS	TMEM211
EIF5AL1		HNRNPM	TMPRSS11E
EIF6		HOOK1	TNS3
ELF1		HOXA1	TOMM40
EMG1		HPS3	TPTE2
ENG		HRK	TRIB2
ENPP5		HSD17B7P2	TRIM26
ENTPD7		HSDL1	TTC25
EPB41		HSPA7	TXNIP
ERLEC1		HTR1D	UGT2B17
ERO1LB		IER3IP1	VAV2
ETV4		IFNA14	VN1R4
ETV5		IGFBP3	VSIG1
EXOC8		IK	WASH7P
EXOSC4		INSIG1	XCL1
EYA3		JHDM1D	ZBTB1
FAM102B		KBTBD3	ZDHHC14
FAM115A		KCNG1	ZFP92
FAM127C		KIAA1328	ZNF266
FAM133B		KIAA1377	ZNF487P
FAM160B1		KIFC3	ZNF578
FAM26E		KLF12
FAM48B2		KLHL24
FAM50A		KLRAP1
FAM63B		KRT15
FAM72D		KRT18
FAM75C1		KRTAP9-2
FAM86DP		LBR
FAM8A1		LCOR
FAU		LGALS9C
FBXO36		LIF
FBXO48		LIN7C
FCGR1A		LOC100129534
FEN1		LOC100129858
FGD6		LOC100130331
FGFRL1		LOC100130507
FKBP14		LOC100287934
FLJ90757		LOC644634
FN1		LOC646214
FNIP1		LOC728613
FOS		LRIG2
FOSL1		LRP6
FOXD4L1		LRRC37A3
FOXRED1		LRRC46
FREM2		LRRC7
FRZB		LRRC8B
FTH1		LUC7L3
FUS		LY6K
GAD2		MAGT1
GCSH		MAN1A1
GDPD1		MAP3K13
GH1		MBLAC2
GIPC3		MED1
GK3P		MED13
GLCE		MGEA5
GLIPR1		MGST3
GNG11		MIB1
GNRH1		MIR127
GOLGA4		MIR16-2
GOLGA6L1		MLL
GOLGA6L10		MLL3
GOLGA8C		MPDU1
GOLGA8E		MPRIP
GPAM		MRPL20
GPATCH4		MRTO4
GPC2		MSX2P1
GPCPD1		MT1L
GPR119		MTMR11
GPR155		MYBBP1A
GPR63		MYEOV
GRAP		MYL12B
GSK3B		MYO6
GSTA5		NAP1L3
GUSBP3		NDUFA12
GYS1		NDUFB9
H3F3A		NETO1
H3F3C		NF1
HCFC1R1		NFYB
HCFC2		NHLRC2
HEATR3		NIPBL
HEATR5A		NIPSNAP3B
HERC2P4		NOC2L
HIAT1		NPM1
HINT2		NR1D1
HINT3		NT5DC2
HIRA		NUCKS1
HIVEP2		NUDT22
HK2		NUDT4P1
HLA-C		OCLM
HLA-DMA		OR1S2
HLA-J		OR8H3
HMBS		OSBP
HMGB3P1		PA2G4
HMGCR		PABPC3
HMGCS1		PAG1
HNRNPM		PANK3
HOOK1		PAR5
HOXA1		PCDH9
HPS3		PDZD11
HRK		PEG10
HSD17B7		PER1
HSD17B7P2		PEX10
HSDL1		PFKFB2
HSPA7		PGAP1
HTR1D		PHLDA1
IDI1		PIKFYVE
IER3IP1		PLA2G4A
IFI30		PLCB4
IFNA14		PLEKHH2
IFNA5		PNRC2
IGFBP3		POLR2F
IGHD		POLR3C
IGLJ3		PPAP2A
IGLON5		PPIAL4G
IK		PPIG
IKZF5		PPM1K
INHBC		PPP1R10
INSIG1		PRB1
JHDM1D		PRPF39
KBTBD3		PRR22
KBTBD8		PRRC1
KCNG1		PTP4A2
KCNH7		PUF60
KCNS1		PURG
KIAA1328		PYROXD1
KIAA1377		RAB5C
KIF4B		RALGAPA1
KIFC3		RAVER2
KLF12		RBM7
KLHL24		RFX3
KLRAP1		RHOC
KRT15		RIMS2
KRT18		RINT1
KRTAP10-5		RNF5P1
KRTAP13-1		RNPC3
KRTAP4-7		RPL15
KRTAP5-5		RPL18
KRTAP9-2		RPL19
LBR		RPL23AP32
LCE1B		RPL23AP53
LCMT2		RPL38
LCOR		RPL7
LGALS13		RPLP0
LGALS9B		RPS26
LGALS9C		RPS27A
LIF		RPSAP52
LIN7C		RRN3P1
LOC100128292		RRP7A
LOC100128653		S100A10
LOC100129534		SAE1
LOC100129858		SAMD9
LOC100130331		SBNO1
LOC100130507		SCAI
LOC100287934		SCAND1
LOC100506571		SCARNA8
LOC644634		SCD
LOC646214		SCNN1B
LOC646513		SDHAP2
LOC728613		SEC24A
LRIG2		SEC24B
LRP6		SEC24D
LRRC37A3		SERPINB8
LRRC46		SHC3
LRRC7		SHFM1
LRRC8B		SHISA5
LUC7L3		SKP1
LY6K		SLC25A10
MAGT1		SLC2A12
MALAT1		SLC30A1
MAN1A1		SLC6A17
MAP1LC3C		SLCO4C1
MAP3K13		SMG1
MBLAC2		SNORA14A
MCM7		SNORA50
MED1		SNORA8
MED13		SNORD113-3
MGC23284		SNORD116-11
MGEA5		SNORD116-2
MGST3		SNORD59A
MIB1		SNRNP48
MIR105-1		SNRPA1
MIR106B		SNX3
MIR127		SPRY2
MIR128-2		SPRY3
MIR130B		SPRY4
MIR154		SQLE
MIR155		ST13
MIR16-2		ST6GALNAC3
MIR197		SUMO1
MIR301A		SYDE1
MIR32		TAS2R46
MIR375		TC2N
MIR485		TFDP1
MIR516B2		THAP2
MIR622		THOC5
MIR95		TMBIM1
MLL		TMBIM6
MLL3		TMED10
MMP1		TMEM199
MOCS3		TMEM223
MPDU1		TMEM39A
MPRIP		TMF1
MRGPRD		TNFRSF12A
MRPL20		TOM1L1
MRTO4		TP53TG3
MSX2P1		TPTE
MT1L		TTBK2
MTMR11		TTC14
MX2		TTC21B
MYBBP1A		TTC32
MYEOV		TUBA1B
MYL12B		TUBA1C
MYO6		TUBD1
NAB2		UBE2K
NANOGP1		UBR2
NAP1L3		UBR5
NCLN		UCK1
NCOA5		UGT2B28
NDOR1		UGT8
NDRG1		VKORC1L1
NDUFA12		VTRNA1-3
NDUFB9		WDR17
NETO1		XPR1
NF1		XRN1
NFKBIA		ZBTB11
NFYB		ZBTB45
NHLRC2		ZCCHC2
NIPBL		ZFP14
NIPSNAP3B		ZKSCAN1
NKTR		ZMYM6
NOC2L		ZNF14
NPM1		ZNF184
NR1D1		ZNF208
NR1D2		ZNF277
NT5DC2		ZNF281
NTSR1		ZNF416
NUCKS1		ZNF449
NUDT22		ZNF493
NUDT4P1		ZNF767
OBP2A		ZNF770
OCLM		ZNF841
OCM		ZSCAN23
OR1S1		ZYG11B
OR1S2
OR2T11
OR2T6
OR4D2
OR4N4
OR51A4
OR7E5P
OR8A1
OR8H3
ORM1
OSBP
PA2G4
PABPC3
PAG1
PAGE2
PAH
PANK3
PAR5
PCDH9
PDK1
PDZD11
PEG10
PER1
PEX10
PFAS
PFKFB2
PFKFB4
PGAP1
PHLDA1
PHLDA2
PIKFYVE
PLA2G4A
PLAG1
PLCB4
PLEKHH2
PLGLA
PMS2CL
PNRC2
POLR2F
POLR3C
POM121L12
POU2F1
PPAP2A
PPIAL4G
PPIG
PPM1K
PPP1R10
PPP2R3C
PRAMEF4
PRB1
PRMT3
PRMT6
PRPF39
PRR22
PRRC1
PSKH1
PTP4A2
PTTG1
PTTG3P
PUF60
PURG
PYROXD1
RAB42
RAB5C
RALGAPA1
RAVER2
RBM7
REL
RFX3
RGPD4
RHOC
RIBC2
RIMBP3C
RIMS2
RINT1
RNASE3
RNF5P1
RNPC3
RNU11
RNU12
RNU4ATAC
ROPN1L
RPL15
RPL18
RPL19
RPL23AP32
RPL23AP53
RPL38
RPL7
RPLP0
RPS26
RPS27A
RPSAP52
RRN3P1
RRP7A
RSPH10B
S100A10
SAE1
SAMD9
SBNO1
SCAI
SCAND1
SCARNA7
SCARNA8
SCARNA9L
SCD
SCML2
SCNN1B
SCNN1G
SDCCAG3
SDHAP2
SEC24A
SEC24B
SEC24D
SEMA6A
SERPINB8
SERPINF1
SERPINI1
SFTA2
SHBG
SHC3
SHFM1
SHISA5
SKP1
SLC16A3
SLC25A10
SLC25A21
SLC2A1
SLC2A12
SLC30A1
SLC5A7
SLC6A17
SLCO4C1
SMG1
SMG6
SNORA14A
SNORA16B
SNORA50
SNORA8
SNORD113-3
SNORD114-2
SNORD115-10
SNORD115-44
SNORD116-11
SNORD116-2
SNORD116-28
SNORD117
SNORD14E
SNORD58A
SNORD59A
SNORD59B
SNRNP48
SNRPA1
SNX3
SPAG7
SPCS2
SPDYE5
SPRN
SPRY2
SPRY3
SPRY4
SPTY2D1
SQLE
SRL
ST13
ST6GALNAC3
STARD4
STARD6
STK19
SUMO1
SYDE1
TAF13
TAS2R13
TAS2R31
TAS2R43
TAS2R46
TBC1D3G
TC2N
TEX13A
TEX15
TFDP1
TFDP3
THAP2
THOC5
TLR5
TMBIM1
TMBIM6
TMED10
TMEM199
TMEM211
TMEM223
TMEM39A
TMEM81
TMF1
TMPRSS11E
TNFRSF12A
TNS3
TOM1L1
TOMM40
TP53TG3
TPTE
TPTE2
TRIB2
TRIM26
TRNP1
TTBK2
TTC14
TTC21B
TTC25
TTC30A
TTC32
TUBA1B
TUBA1C
TUBD1
TXNIP
UBE2K
UBR2
UBR5
UCK1
UGT2B17
UGT2B28
UGT8
UQCRB
USP12
VAV2
VKORC1L1
VN1R4
VSIG1
VTRNA1-3
WASH7P
WDR17
XCL1
XCL2
XPR1
XRN1
ZBTB1
ZBTB11
ZBTB45
ZCCHC2
ZDHHC14
ZFP14
ZFP92
ZKSCAN1
ZMAT3
ZMYM6
ZNF14
ZNF184
ZNF192
ZNF208
ZNF266
ZNF277
ZNF280C
ZNF281
ZNF416
ZNF443
ZNF449
ZNF487P
ZNF493
ZNF578
ZNF767
ZNF770
ZNF841
ZSCAN23
ZYG11B
